# Supplementary material for: Verification of a Blood-Based Targeted Proteomics Signature for Malignant Pleural Mesothelioma
Source: Oxford University Press journal article supplement (doi:10.1158/1055-9965.epi-20-0543), 2020-07-30
Supplement: 10559965epi200543-sup-241013_2_supp_6419361_qdbybh.xlsx [file 10559965epi200543-sup-241013_2_supp_6419361_qdbybh.xlsx]

## Sheet: Sheet1
Supplementary Table 3: demographics of the populations of the training and testing sets
		Training Set				Testing Set
		Mesothelioma		Asbestos Exposed		Mesothelioma		Asbestos Exposed
Total (N)		105		104		108		85
Cohort
Australia (N)		49		48		39		44
New York (N)		40		56		47		41
Zurich (N)		16				22
Age (y), average ± SD		64.6 (± 8.9)		67.9 (± 10.9)		62.5 (± 10.0)		66.3 (± 9.8)
Gender, no. (%)
Male		90 (85.7 %)		84 (80.8 %)		90 (83.3 %)		77 (90.6 %)
Female		15 (14.3 %)		14 (13.5 %)		18 (16.7 %)		4 (4.7 %)
Histology, no. (%)
Epithelial		68 (64.8 %)				80 (74.1 %)
Other (or not specified)		37 (35.2 %)				28 (25.9 %)
Stage, no. (%)
I/II		40 (38.1 %)				45 (41.7 %)
III/IV		53 (50.5 %)				49 (45.4 %)
Not specified		12 (11.4 %)				14 (13.0 %)
* for 3 mesothelioma cases age not available (1 in training, 2 in testing set)
* for 10 asbestos cases gender not available (6 in training and 4 in testing set)
